# Supplementary material
Source: PubMed Central journal article supplement (PMC1383637)
Supplement: plntcell_tpc.105.037622_5.pdf [file plntcell_tpc.105.037622_5.pdf]

|      |   |                                                                                                                                      |
|------|---|--------------------------------------------------------------------------------------------------------------------------------------|
| PLA2 | 1 | CKDTRTTVMIRNIPNKYSQKLLNMLDNHCI-(17)-SSYDFLYLPIDFN-----NKCNVGYGFVNLTSPEAAVRLYKAFHKQPWEVFNS--RKICQVTYARVQGLDALKEHFKNSKFP-CDSDEYLPVVF   |
| OML2 | 1 | GDDTRTTLMIKNIPNKYTSKMLLAATIDFHK-----GTYDFFYLPIDFK-----NKCNVGYAFINMISPVHIVSFYQAFNGKWEKFNS--EKVASLAYARIQGRITALISHFQNSSLM-NEDKRCRPILF   |
| OML3 | 1 | GEDSRTTLMIKNIPNKYNCKLLAVIDENHR-----GTYDFIYLPIDFK-----NKCNVGYAFINMTDPQHIIPFYKTFNGKKWEKFNS--EKVASLAYARIQGRSALIAHFQNSSLM-NEDKWCRPMLF    |
| OML4 | 1 | -DDSRTTLMIKNIPNKYTSKMLLAATIDENHK-----GTYDFIYLPIDFK-----NKCNVGYAFINMTNPQHIIPFYQTFNGKKWEKFNS--EKVASLAYARIQGKSALIAHFQNSSLM-NEDKRCRPILF  |
| OML5 | 1 | GKDTRTTLMIKNIPNKYTSNMLLEVIDETHE-----GTYDFFYLPIDFK-----NKCNVGYAFINMASPGYIVSFKAFAGRKWEKFNS--EKVVSLAYARIQGKAALVNHFQNSSLM-NEDKRCRPMLF    |
| OML6 | 1 | FTATITSLMIRNIPNKFLKARLMAILDQHCA-(19)-SEYDFFYVPIDFK-----TGFNKGYAFVNMTATAARRLRAFLQDHRWD--AAMS-GKVCVVPAAIQGLDAFVAHF-SASCFCPCRTKEFLPVWF  |
| OML7 | 1 | LKPAHTTVMVRNIPNKLTRSDVVRLLDDHCA-(13)-AEYDLVYVRIDFGMCKERSNMGYAFVNFTTAEAARGLQFALHGCRWKRSAFDSGKIIDIRAARIQGGDALVRHFGRITTYECDTDEYLPVAF    |
| TE1  | 1 | EMDTRTTVMIRNIPNKYSQKLLNMLDNHCI-(15)-SAYDFVYLPIDFN-----NKCNVGYGFVNLTSPEARVRLYKAFHKQPWEVYNS--RKICQVTYARVQGLEALKEHFKNSKFP-CDSDEYLPVAF   |
| TEL1 | 1 | CRDPRTTLMIKNIPNKYSQKLLDMLDKHCI-(20)-SSYDFVYLPIDFN-----NKCNVGYGFVNMTSPEAAWRFYKAFHGQRWEVFNS--HKICQITYARVQGLEDLKEHFKSSKFP-CEAELYLPVVF   |
| TEL2 | 1 | FRDGRTTVMIKNIPNKYTQKLLKMLDTHCK-(15)-SSYDFVYLPIDFS-----NKSNGYGFVNMTSPEAVWRLYKSFHNQWRDFTTT-RKICEVTYARIQGGLESREHFKNVRLAGVEIDEYMPVVF     |
| AML1 | 1 | GEDRRTTLMIKNIPNKYTSKMLLSAIDEHCK-----GTYDFLYLPIDFK-----NKCNVGYAFINLIEPEKIVPFFKAFNGKWEKFNS--EKVATLTYARIQGKTALIAHFQNSSLM-NEDKRCRPILF    |
| AML2 | 1 | GDEIRTTLTIKNIPNKYTYKMLVAEIDEKHK-----GDYDFLCLPTDFK-----NKCNGHAFINMVSPHLIVPFQQTFFNGKIWEKFNS--GKVASLAYAEIQGKSALASYMQTPSSM-KEQQLFPPEVS   |
| AML3 | 1 | GEDPRTTLMIKNIPNKYTRNMLLAATIDENKNS-----GTYDFLYLPIDFK-----NKCNVGYAFINMVSPKFTIALYEAFFNGKWDKFNS--EKVASLAYARIQGKAALIAHFQNSSLM-NEDRRCQPIVF |
| AML4 | 1 | GEDSRTTLMIKNIPNKYTSKMLLAATIDEYCK-----GTYDFLYLPIDFK-----NKCNVGYAFINLIEPENIVPFYKAFNGKWEKFNS--EKVASLAYARIQGKSALIAHFQNSSLM-NEDKRCRPILF   |
| AML5 | 1 | GEDSRTTLMIKNIPNKYTSKMLLAATIDENQ-----GTYNFLYLPIDFK-----NKCNVGYAFINMLNPELIPFYEAFFNGKWEKFNS--EKVASLAYARIQGKSALIAHFQNSSLM-NEDMRCRPIIF    |
| MCT1 | 1 | KLGRTSVMVKNIPNCLGRMDLRLDNLHCYKHNEK-SSYDFLYLPIDFG-----KRNLYGAFVNFTSSLAAERFRREFENFSWDNIGFR-KKICEITVAKYGGKEELTRHF-RNSRFTCHTDDYLPVVL     |
| MCT2 | 1 | NGDHIITVMLRNIPNRYTREMVIQFMDKHCE-(13)-SAYDFIYLPIDFR-----TTMNKGYAFVNFTNAKAVSKFKAACNNKPWFHYS--KKELEITYARIQANELVKRFQHMITYP---EEAYSAVCF   |
| ME12 | 1 | GIDTRTTVMIKNIPNKFTQQMLRDYIDVTNK-----GTYDFLYLRIDFV-----NKCNVGYAFINFIEPQSIITFGKARVGTQWNVFHS--EKICDISYANIQGGDRLIEKFRNSCVN-DENPAYRPKIF   |

Supplemental Figure 5
