# Supplementary material
Source: PubMed Central journal article supplement (PMC1383637)
Supplement: plntcell_tpc.105.037622_7.pdf [file plntcell_tpc.105.037622_7.pdf]

Supplementary Table 1. Phenotypes of wt versus *te1* siblings in vegetative phase

|                    | <i>wt</i> | <i>te1</i> |
|--------------------|-----------|------------|
| Plastochron        | 2.4±0.1   | 1.4±0.1    |
| SAM width (A)(μm)  | 169±9     | 140±15     |
| SAM height (B)(μm) | 122±15    | 68±19      |
| SAM shape (B/A)    | 0.72      | 0.49       |

Values indicate the means of 10 individuals ±s.d

## Supplemental Table 1
