# Supplementary material
Source: PubMed Central journal article supplement (PMC1383637)

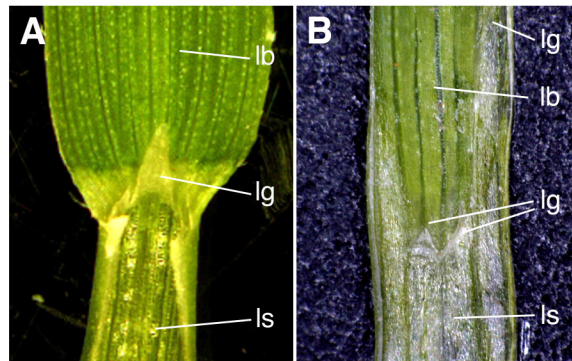

Supplemental Figure 1

Supplement: plntcell_tpc.105.037622_1.pdf [file plntcell_tpc.105.037622_1.pdf]

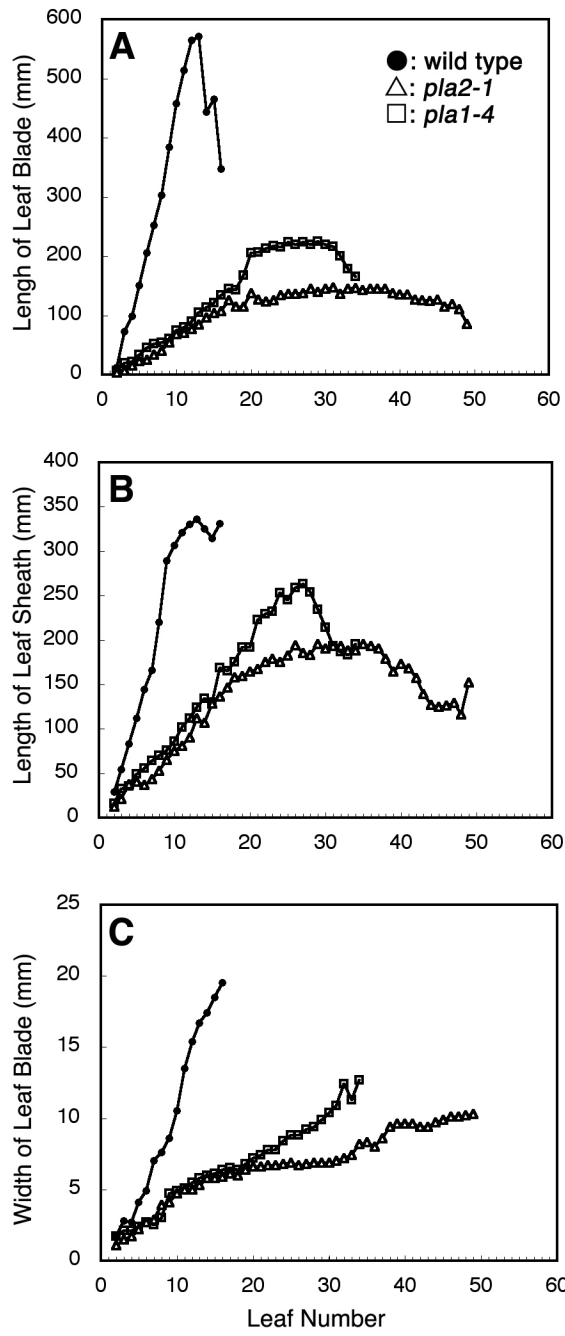

Supplemental Figure 2

Supplement: plntcell_tpc.105.037622_2.pdf [file plntcell_tpc.105.037622_2.pdf]

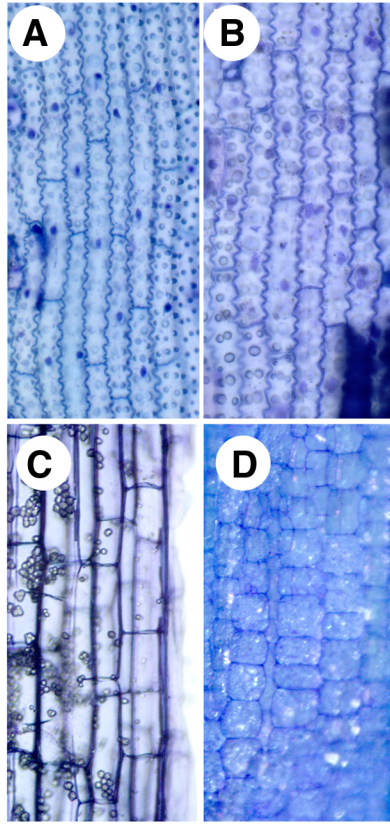

Supplemental Figure 3

Supplement: plntcell_tpc.105.037622_3.pdf [file plntcell_tpc.105.037622_3.pdf]

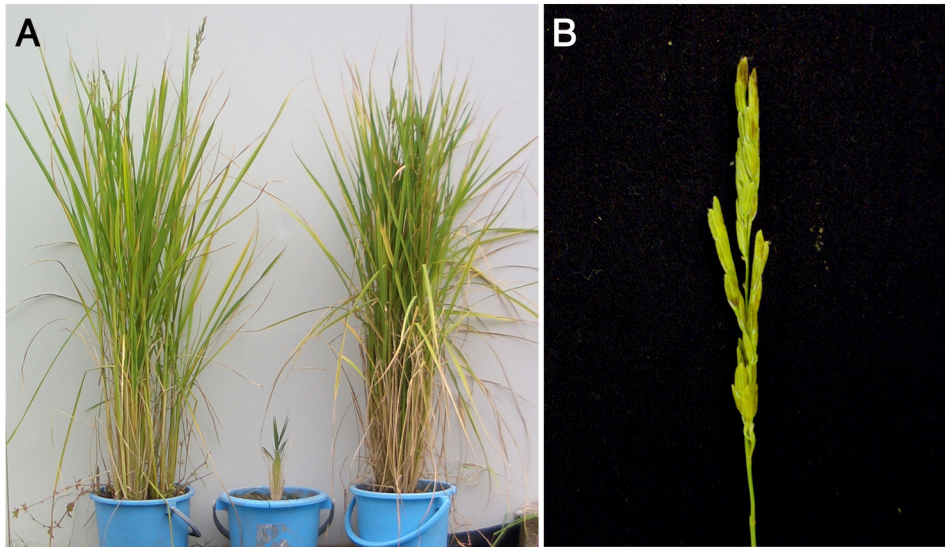

Supplemental Figure 4

Supplement: plntcell_tpc.105.037622_4.pdf [file plntcell_tpc.105.037622_4.pdf]

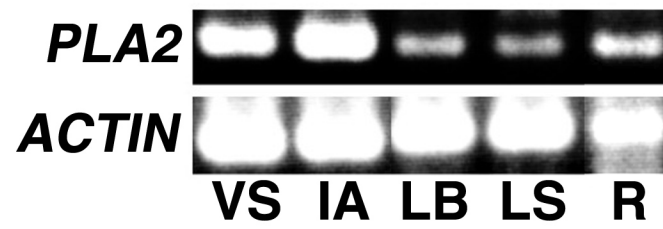

Supplemental Figure 6

Supplement: plntcell_tpc.105.037622_6.pdf [file plntcell_tpc.105.037622_6.pdf]
